# Supplementary material
Source: publisher site journal article supplement (https://www.spandidos-publications.com/5112/downloadSupplementary)
Supplement: Supplementary file 1 [file downloadSupplementary]

## Sheet: Table S15
Table SXV. The P-value of DNase expression and the ESTIMATES score in different cancer types.
Cancer type	DNASE1	DNASE1L1	DNASE1L2	DNASE1L3	DNASE2	DNASE2B
ACC	0.0127334	0.408856	2.29262e-09	0.000295063	0.931545	0.57921
BLCA	2.98889e-11	0.287185	8.23254e-11	3.62536e-29	0.00102517	0.0864328
BRCA	4.40121e-06	0.00543051	6.71529e-10	4.20077e-80	0.878954	5.7667e-15
CESC	0.0218072	0.706825	0.00186242	8.9491e-09	0.0046726	6.92981e-07
CHOL	0.44209	0.499678	0.676261	0.03497	0.782177	0.0207471
COAD	5.19512e-05	0.192946	0.00317708	1.4666e-06	1.23347e-08	0.296173
DLBC	0.143102	0.0400888	0.000104751	0.115833	1.20385e-05	0.00295528
ESCA	0.801003	0.432036	0.452166	0.438793	0.0263941	0.00763371
GBM	1.26964e-10	0	2.62118e-05	0.00548023	0	0.57961
HNSC	0.00175947	0.0756314	0.173653	1.91517e-08	0.00427337	5.47151e-25
KICH	0.938265	0.0181264	0.00815049	0.00173555	0.449735	0.008787
KIRC	0.00299597	0.375873	9.64379e-05	0.0644158	1.03869e-12	5.80313e-23
KIRP	6.00922e-10	0.126312	1.94335e-06	3.87948e-12	0	1.05505e-25
LAML	0.12416	5.4425e-09	0.0901622	7.76569e-05	0.134348	0.165042
LGG	1.62506e-12	0	8.41563e-10	0.00352574	0	1.03299e-25
LIHC	0.596868	0.0227093	4.94293e-05	6.92601e-06	0.257004	4.19932e-12
LUAD	8.44651e-05	0.00727169	0.187951	8.55958e-18	0	1.67749e-31
LUSC	8.46012e-06	3.76427e-06	0.0065927	0.107179	0.00516615	3.25863e-29
MESO	0.000115187	0.764154	0.929914	4.50926e-07	0.927167	4.86226e-05
OV	0.00012062	7.59823e-08	0.128397	2.62406e-19	0.456717	1.40052e-08
PAAD	0.000210678	0.00505557	8.74531e-11	8.84968e-12	0.00712708	3.01703e-07
PCPG	9.16631e-10	0.0252651	0.0184982	1.68289e-08	0.582421	0.000123709
PRAD	1.02803e-06	7.58695e-05	0.190543	0	2.15335e-09	3.02146e-09
READ	0.00653015	0.000233558	0.754569	0.0061217	0.000693083	0.891339
SARC	0	0.00220675	0.00054653	1.51712e-11	8.08709e-09	0.000120274
SKCM	0.0149082	0.172677	0.0360716	3.40859e-46	5.82763e-10	0.00761544
STAD	0.00121166	0.414819	1.62754e-07	6.62339e-13	4.80925e-10	1.89018e-10
TGCT	0.0995325	1.96405e-08	0.0287843	0	0	7.10378e-16
THCA	0.00130585	1.25435e-05	0.000268309	0.0004188	2.85697e-14	4.0013e-19
THYM	0.234342	0.909071	0.204534	8.93315e-06	0.672041	0.887827
UCEC	0.0524454	0.659232	0.794799	2.20506e-47	0.693509	6.30974e-08
UCS	0.0110892	0.185287	0.130355	0.0027415	0.0670198	0.134225
UVM	0.0513124	0.199463	0.643513	0	9.89471e-07	2.38576e-06
